# Supplementary material
Source: PubMed Central journal article supplement (PMC5239682)
Supplement: SD5.pdf [file SD5.pdf]

## SUPPLEMENTAL INFORMATION

**Viral culture, identification, and sequencing.** *Cell cultures.* Cell lines A549 (CCL-185), LLC-MK2 (CCL-7), MDCK (CCL-34), MRC5, and Vero E6 (CRL-1586) were obtained from the American Type Culture Collection (Manassas, VA), and were propagated as monolayers at 37°C and 5% CO<sub>2</sub> in Advanced Dulbecco's Modified Eagle's Medium (aDMEM) (Invitrogen Corp., Carlsbad, CA) or Eagle's Minimal Essential Medium (EMEM) (Invitrogen Corp.), as appropriate per cell line. aDMEM and EMEM were supplemented with 2 mM L-Alanyl-L-Glutamine (GlutaMAX™; Invitrogen Corp.), antibiotics (PSN; 50 µg/mL penicillin, 50 µg/mL streptomycin, 100 µg/mL neomycin [Invitrogen Corp.]), and 10% (v/v) low IgG, heat-inactivated gamma-irradiated fetal bovine serum (FBS) (HyClone, Logan, UT). Additionally, sodium pyruvate (Invitrogen Corp.) and nonessential amino acids (HyClone) were added to EMEM. Before seed stocks were prepared, the cell lines were propagated in growth media with plasmocin (Invivo-gen, San Diego, CA) for 2 weeks to reduce the chances of mycoplasma contamination, then for a minimum of 2 weeks in the absence of antibiotics to determine whether fast-growing microbial contaminants were present or abnormal morphological changes would occur (associated with intracellular mycoplasma). Following 2–3 weeks of propagation without antibiotics, the plasmocin-treated cell lines were tested by polymerase chain reaction (PCR) to confirm an absence of mycoplasma DNA.<sup>1</sup>

*Virus isolation.* Aliquots of plasma (25–100 µL) from febrile patients that had tested negative for Chikungunya virus RNA by reverse transcription PCR (RT-PCR) (details to be presented elsewhere) were inoculated onto duplicate sets of cells grown in 25 cm<sup>2</sup> rectangular canted-neck cell culture flasks with vent caps (Cat no. 430639, Corning Incorporated, Corning, NY). A total of 10 flasks were used per plasma sample. Cell culture flasks were used so that plasma could be inoculated onto a relatively wide surface area; otherwise, the complex mix of biomolecules in human plasma/serum can induce nonspecific cytopathic effects (CPEs) that are mistaken for virus-induced CPE. Sets consisting of five different cell lines (A549, LLC-MK2, MDCK, MRC5, and Vero E6) were used to increase the chance of isolating a wide array of viruses. One set was inoculated at 37°C, the other at 33°C. All cells were in complete medium with serum, except for MDCK cells at 33°C, which were in serum-free medium containing 2 µg/mL of L-1-tosylamide-2-phenylethyl chloromethyl ketone (TPCK)-treated trypsin.<sup>2</sup> Noninoculated cells were held in parallel with the inoculated cells and served as negative controls. All the cells were observed daily for development of virus-induced CPE using an inverted microscope with phase-contrast optics, and refed every 3 days with complete medium containing either 4% FBS (or serum-free medium with TPCK trypsin). The cells were maintained and observed for 1 month before being considered negative for virus isolation.

*Virus screens.* This work was focused on the isolation and/or detection of alpha- and flaviviruses, and PCR-based methods for the detection of the nucleic acids of those viruses (to be presented elsewhere) were used for primary screens. A limited number of PCR-based methods were

also used for secondary tests; these were for the detection of arenaviruses and enteroviruses, which are viruses that could be in serum/plasma in febrile patients. Furthermore, the GenMark multiplex respiratory PCR eSensor XT-8 Respiratory Viral Panel (eSensor RVP; GenMark Diagnostics, Inc., Carlsbad, CA) was used to screen for respiratory viruses according to instructions from the manufacturer. The system detects the genomic material of influenza A virus (including subtypes H1 and H3), influenza A virus 2009 H1N1, influenza B virus, respiratory syncytial viruses A and B, parainfluenza viruses 1, 2, 3, and 4, human metapneumovirus, adenoviruses B/E and C, human coronaviruses (HCoV) (-229E, -NL63, -HKU1, -OC43), and human rhinoviruses A and B. Briefly, in the case of viral genomic RNA (vRNA), the extracted nucleic acid is reverse transcribed and amplified using viral-specific primers with an RT-PCR enzyme mix. The amplified DNA is converted to single-stranded DNA via exonuclease digestion and is combined with a signal buffer containing ferrocene-labeled signal probes that are specific for the different viral targets. A signal in nano-Amperes (nA) is provided; signals higher than a threshold value are considered positive.

*RT-PCR tests for confirmation of HCoV-NL63.* Following detection of HCoV-NL63 vRNA by the GenMark eSensor XT-8 RVP, confirmation was attained using methods outlined in reference.<sup>3</sup> Briefly, vRNA was extracted from spent cell media using a QIAamp Viral RNA kit (QIAGEN, Valencia, CA), and RT-PCR amplicons generated using primer pairs Cor-FW and Cor-RV,<sup>4</sup> N5-PCR1 and N3-PCR1,<sup>4</sup> and repSZ-1 and repSZ-3,<sup>5</sup> were sequenced. Reverse transcription procedures were performed with Omniscript reverse transcriptase (Qiagen), and PCR with Hotshot TAQ (New England Biolabs, Ipswich, MA) with extension at 68°C.

*Nucleotide sequencing.* Targeted HCoV-NL63 sequences were RT-PCR-amplified from purified vRNA using a genome walking strategy (3). Briefly, overlapping primers described by Geng and others (GenBank JX524171) and others<sup>4,5</sup> were used to obtain the complete genomic sequence of one of the HCoV-NL63 isolates from Haiti (designated HCoV-NL63/Haiti-1/2015). Following the same methods, spike, membrane, and nucleocapsid gene sequences were also obtained for HCoV-NL63 isolates 2, 3, and 4 from Haiti. As before,<sup>3</sup> AccuScript High Fidelity Reverse Transcriptase (Agilent Technologies Inc., Santa Clara, CA) was used for first-strand cDNA synthesis in the presence of SUPERase-In RNase inhibitor (Ambion, Austin, TX), and PCR was performed using Phusion Polymerase (New England Biolabs, Ipswich, MA) with denaturation steps performed at 98°C. The 3' and 5' ends of HCoV-NL63/Haiti-1/2015 were determined using a RACE (rapid amplification of cDNA ends) kit (RLM RACE; Ambion) following the manufacturer's instructions. For all, nucleotide sequences were analyzed using an Applied Biosystem 3130 DNA analyzer by using BigDye Terminator (v. 3.1) (Applied Biosystems, Inc., Foster City, CA) chemistry and the same primers used for amplifications.

*GenBank accession numbers.* HCoV-NL63/Haiti: KT266906; KX179494- KX179499. HCoV-NL63/Florida: KT381875.1; KU521535.1

*Phylogenetic analysis.* Forty-four complete genome and 148 spike gene region sequences were downloaded from NCBI (Supplemental Table 1). Inclusion criteria for the sequences were 1) the sequences were published in peer-reviewed

journals, 2) no uncertainty regarding the subtype assignment and being classified, 3) potential recombinants or poor-quality sequences (i.e., sequences with uncertain nucleotide assignments) were excluded, and 4) city/state and sampling time were known and clearly established in the original publication. The locations of the reference sequences considered for the analysis were Belgium, China, Ghana, Hong Kong, Japan, Malaysia, the Netherlands, Sweden, Thailand, and the United States. A multiple sequence alignment of the spike gene region, including the 192 reference sequences as well as the two new sequences from Shands and the four from Haiti, was then obtained with ClustalX<sup>6</sup> followed by manual editing using Bioedit.<sup>7</sup> The evolutionary model was chosen as the best-fitting nucleotide substitution model in accordance with the results of the hierarchical likelihood ratio test implemented with the Modeltest software version 3.7.<sup>8</sup> The full alignment is available from the authors on request.

**Likelihood mapping and phylogenetic inference.** The phylogenetic signal in the aligned sequences was investigated with the likelihood mapping method that analyzes every possible group of four sequences, referred to as a “quartet.”<sup>9</sup> For each quartet, the likelihood of each one of the three possible unrooted trees is estimated, and the three likelihoods are eventually reported as a dot in an equilateral triangle (the likelihood map) that is subdivided in to three main areas: the three corners, representing fully resolved tree topologies (i.e., the presence of treelike phylogenetic signal in the data); the center, representing star-like phylogeny signal (i.e., phylogenetic noise); and the three side areas indicating network-like phylogeny (i.e., presence of recombination or conflicting phylogenetic signals). Findings from extensive simulation studies suggest that a central area with < 30% dots can be used as the criterion of robust phylogenetic signal. The likelihood mapping analysis was performed with the program TREE-PUZZLE.<sup>9</sup> The percentage of dots (noise level) falling in the central likelihood map was 15.5% indicating sufficient signal to infer a robust phylogeny.

**Bayesian time-scaled phylogeny.** The evolutionary rate of the Coronavirus NL63 spike region was estimated by calibrating a molecular clock using known sequences sampling times with the Bayesian Markov Chain Monte Carlo (MCMC) method implemented in BEAST v. 1.8 (<http://beast.bio.ed.ac.uk>)<sup>10,11</sup> and by enforcing either a strict or a relaxed molecular clock with an lognormal distribution for the prior rates. Four independent MCMC runs were carried out enforcing a relaxed molecular clock (which resulted the best fit for the data, see Results Section) and one of the following coalescent priors: constant population size, exponential growth, nonparametric smooth skyride plot Gaussian Markov random field, and nonparametric Bayesian skyline plot.<sup>10,12,13</sup> Marginal likelihoods estimates for each model were obtained using path sampling and stepping stone analyses.<sup>14–16</sup> Uncertainty in the estimates was indicated by 95% high posterior density intervals, and the best fitting model for the data set was selected by calculating the Bayes factors (BFs).<sup>15,17</sup> In practice, any two models were compared to evaluate the strength of evidence against the null hypothesis ( $H_0$ ), defined as the one with the lower marginal likelihood:  $2 \ln \text{BF} < 2$  indicates no evidence against  $H_0$ ; 2–6, weak evidence; 6–10, strong evidence;

and > 10 very strong evidence. For each data set, the MCMC sampler was run for at least  $50 \times 10^6$  generations, sampling every 5,000 generations. Proper mixing of the MCMC was assessed by calculating the effective sample size (ESS) of each parameter. Only parameter estimates with ESS > 250 were accepted. Phylogeographic analysis was conducted by using the continuous time Markov chain process over discrete sampling locations implemented in BEAST<sup>18</sup> with the Bayesian Stochastic Search Variable Selection model, which allows diffusion rates to be zero with a positive prior probability. The maximum clade credibility tree was selected from the posterior tree distribution after a 10% burn-in using Tree Annotator version 1.8 included in the BEAST package.<sup>10,11</sup> Statistical support for specific monophyletic clades was assessed by calculating the posterior probability. The phylogenetic tree with full sequence labels is included in Supplemental Figure 1.

## REFERENCES

- Lednický JA, Wyatt DE, 2012. The art of animal cell culture for virus isolation. Ceccherini-Nelli L, Zagreb MB, eds. *Biomedical Tissue Culture*. Zagreb, Croatia: InTech, 151–178. ISBN 978–953–51.
- Hamilton SB, Wyatt DE, Wahlgren BT, O’Dowd MK, Morrissey JM, Daniels DE, Lednický JA, 2011. Higher titers of some H5N1 and recent human H1N1 and H3N2 influenza viruses in Mv1 Lu vs. MDCK cells. *Virology* 8: 66.
- Lednický JA, Waltzek TB, McGeehan E, Loeb JC, Hamilton SB, Luetke MC, 2013. Isolation and genetic characterization of human coronavirus NL63 in primary human renal proximal tubular epithelial cells obtained from a commercial supplier, and confirmation of its replication in two different types of human primary kidney cells. *Virology* 10: 213.
- Moës E, Vijgen L, Keyaerts E, Zlateva K, Li S, Maes P, Pyrc K, Berkhout B, van der Hoek L, van Ranst M, 2005. A novel pancoronavirus RT-PCR assay: frequent detection of human coronavirus NL63 in children hospitalized with respiratory tract infections in Belgium. *BMC Infect Dis* 5: 6.
- van der Hoek L, Pyrc K, Jebbink MF, Vermeulen-Oost W, Berkhout RJ, Wolthers KC, Wertheim-van Dillen PM, Kaandorp J, Spaargaren J, Berkhout B, 2004. Identification of a new human coronavirus. *Nat Med* 10: 368–373.
- Thompson JD, Gibson TJ, Plewniak F, Jeanmougin F, Higgins DG, 1997. The CLUSTAL\_X windows interface: flexible strategies for multiple sequence alignment aided by quality analysis tools. *Nucleic Acids Res* 25: 4876–4882.
- Hall TA. 1999. BioEdit: a user-friendly biological sequence alignment editor and analysis program for Windows 95/98/NT. *Nucleic Acids Symp* 41: 95–98.
- Posada D, Buckley TR, 2004. Model selection and model averaging in phylogenetics: advantages of akaike information criterion and bayesian approaches over likelihood ratio tests. *Syst Biol* 53: 793–808.
- Schmidt HA, Strimmer K, Vingron M, von Haeseler A, 2002. TREE-PUZZLE: maximum likelihood phylogenetic analysis using quartets and parallel computing. *Bioinformatics* 18: 502–504.
- Drummond AJ, Rambaut A, Shapiro B, Pybus OG, 2005. Bayesian coalescent inference of past population dynamics from molecular sequences. *Mol Biol Evol* 22: 1185–1192.
- Drummond AJ, Rambaut A, 2007. BEAST: Bayesian evolutionary analysis by sampling trees. *BMC Evol Biol* 7: 214.
- Drummond AJ, Nicholls GK, Rodrigo AG, Solomon W, 2002. Estimating mutation parameters, population history and genealogy simultaneously from temporally spaced sequence data. *Genetics* 61: 1307–1320.
- Minin VN, Bloomquist EW, Suchard MA, 2008. Smooth skyride through a rough skyline: Bayesian coalescent-based inference of population dynamics. *Mol Biol Evol* 25: 1459–1471.

14. Baele G, Lemey P, Vansteelandt S, 2013. Make the most of your samples: Bayes factor estimators for high-dimensional models of sequence evolution. *BMC Bioinformatics* 14: 85.
15. Baele G, Li WLS, Drummond AJ, Suchard MA, Lemey P, 2013. Accurate model selection of relaxed molecular clocks in bayesian phylogenetics. *Mol Biol Evol* 30: 239–243.
16. Baele G, Lemey P, 2013. Bayesian evolutionary model testing in the phylogenomics era: matching model complexity with computational efficiency. *Bioinformatics* 29: 1970–1979.
17. Kass RE, Raftery AE, 1995. Bayes factors. *J Am Stat Assoc* 90: 773–795.
18. Lemey P, Rambaut A, Drummond AJ, Suchard MA, 2009. Bayesian phylogeography finds its roots. *PLOS Comput Biol* 5: 1–16.



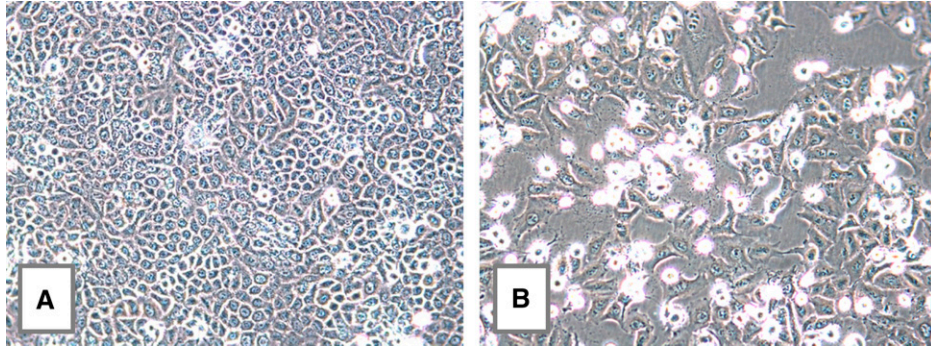

SUPPLEMENTAL FIGURE 1. *Enterovirus* D68 in A549 cells. (A) Mock-infected A549 cells, 6 days post-seed. (B) A549 cells, 6 days postinoculation with plasma. Infected cells display characteristic cytopathic effect (CPE) at 33°C: cell rounding followed by detachment from the growing surface, whereas CPE are not observed at 37°C (not shown). Images at an original magnification at  $\times 200$ .

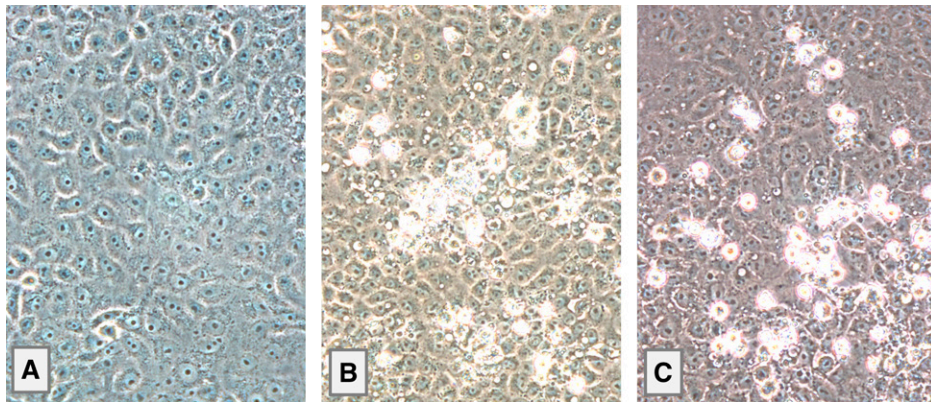

SUPPLEMENTAL FIGURE 2. Dengue viruses in Vero E6 cells incubated at 37°C. (A) Mock-infected Vero cells, 8 days postseed. (B) *Dengue virus* 1-infected cells, 8 days postinoculation with plasma. (C) *Dengue virus* 4-infected cells, 8 days postinoculation with plasma. The virus infected cells display diffuse cytopathic effect (CPE) including darkening of the cytoplasm prior to death (colorless refractile cells). Some infected cells contain one or more large vacuoles. Images at an original magnification of  $\times 200$ .

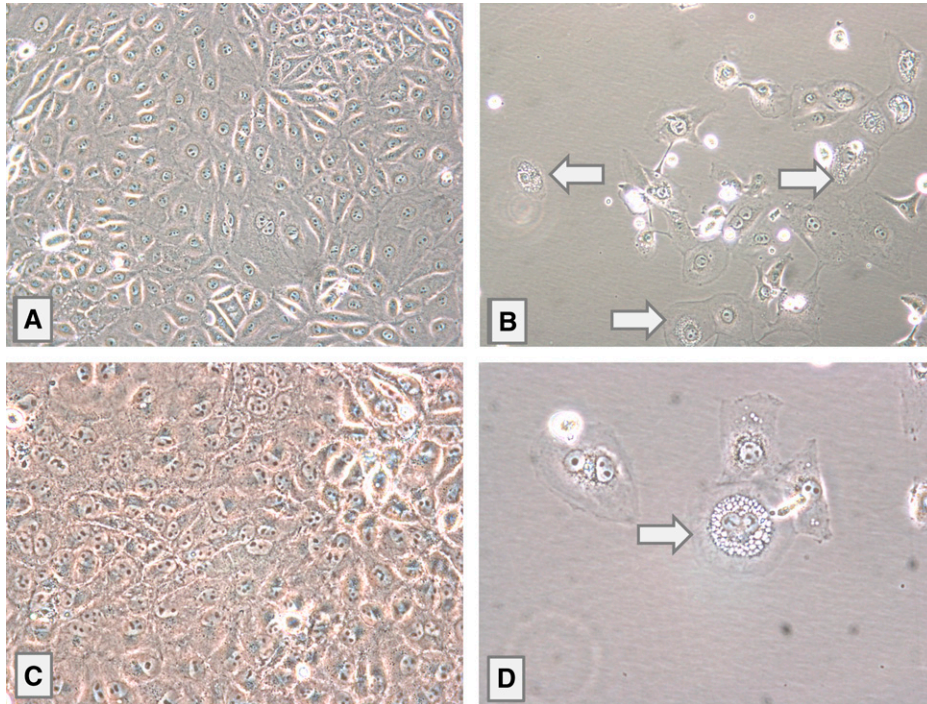

SUPPLEMENTAL FIGURE 3. Zika virus in LLC-MK2 cells. (A) Mock-infected LLC-MK2 cells, 9 days post-seed, image at original magnification  $\times 200$ . (B) *Zika virus*-infected cells, 9 days post-inoculation with plasma, image at original magnification  $200\times$ . (C) Mock-infected LLC-MK2 cells, 9 days post-seed, image at original magnification  $\times 400$ . (D) *Zika virus*-infected cells, 9 days post-inoculation with plasma, image at original magnification  $\times 400$ . Prior to cell death, perinuclear vacuoles are present in most cells (white arrows).

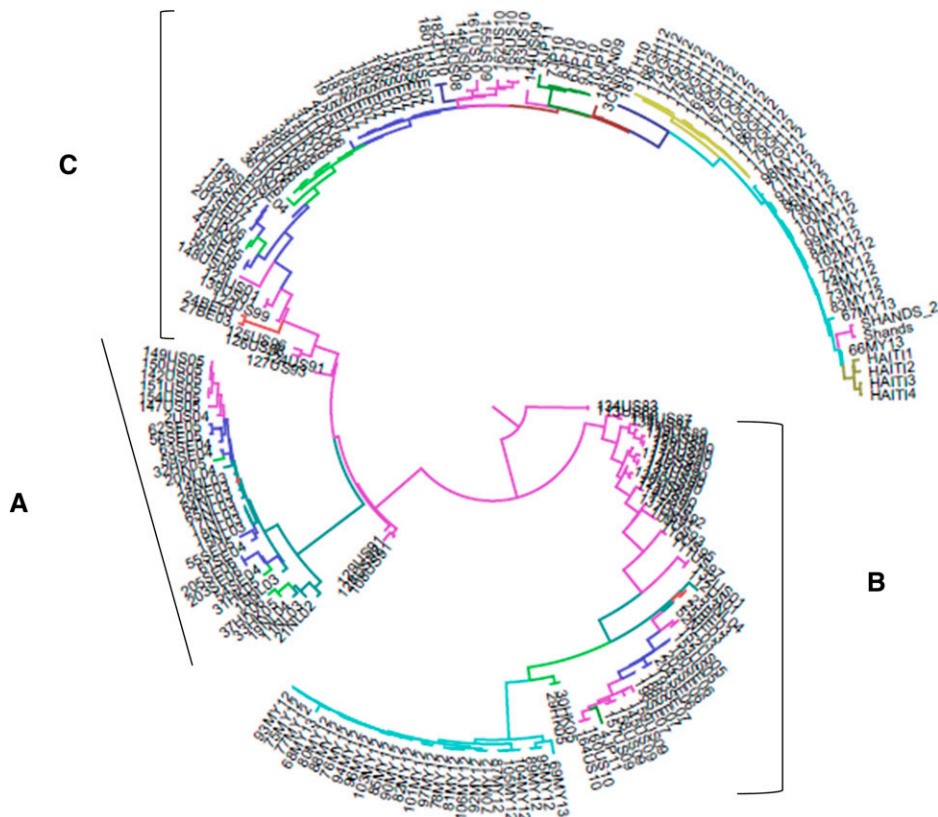

SUPPLEMENTAL FIGURE 4. Maximum Clade Credibility (MCC) tree of HCoV-NL63 spike gene region with sequence labels. Branches are colored according to the legend in Figure 2, where each color represents the geographic location of the sampled sequence (tip branches), as well as of the ancestral lineage (internal branches) inferred by Bayesian phylogeography. For display purposes, the tree is displayed as a polar tree.



SUPPLEMENTAL TABLE 1

Accession number, gene region and country of reference sequences included in this study.

| Accession number | Gene region        | Country       | Tip name |
|------------------|--------------------|---------------|----------|
| KT381875         | Complete genome    | United States | Shands   |
| KU521535         | Complete genome    | United States | SHANDS_2 |
| KT266906         | Complete genome    | Haiti         | HAITI1   |
| JX504050         | Complete genome    | United States | 2US04    |
| JX104161         | Complete genome    | China         | 3CN08    |
| AB695189         | Spike glycoprotein | Japan         | 4JP11    |
| AB695188         | Spike glycoprotein | Japan         | 5JP11    |
| AB695187         | Spike glycoprotein | Japan         | 6JP10    |
| AB695186         | Spike glycoprotein | Japan         | 7JP10    |
| AB695185         | Spike glycoprotein | Japan         | 8JP10    |
| AB695184         | Spike glycoprotein | Japan         | 9JP10    |
| AB695183         | Spike glycoprotein | Japan         | 10JP10   |
| DQ462792         | Spike glycoprotein | Netherlands   | 11NL03   |
| DQ462789         | Spike glycoprotein | Netherlands   | 14NL03   |
| DQ462788         | Spike glycoprotein | Netherlands   | 15NL03   |
| DQ462787         | Spike glycoprotein | Netherlands   | 16NL03   |
| DQ462786         | Spike glycoprotein | Netherlands   | 17NL03   |
| DQ462785         | Spike glycoprotein | Netherlands   | 18NL03   |
| DQ462784         | Spike glycoprotein | Netherlands   | 19NL04   |
| DQ462783         | Spike glycoprotein | Netherlands   | 20NL04   |
| DQ462782         | Spike glycoprotein | Netherlands   | 21NL02   |
| AY758299         | Spike glycoprotein | Belgium       | 23BE03   |
| AY758301         | Spike glycoprotein | Belgium       | 24BE03   |
| AY758300         | Spike glycoprotein | Belgium       | 25BE03   |
| AY758298         | Spike glycoprotein | Belgium       | 26BE03   |
| AY758297         | Spike glycoprotein | Belgium       | 27BE03   |
| GQ856814         | Spike glycoprotein | Hong Kong     | 29HK05   |
| GQ856812         | Spike glycoprotein | Hong Kong     | 30HK05   |
| GQ856813         | Spike glycoprotein | Hong Kong     | 31HK05   |
| GQ856811         | Spike glycoprotein | Hong Kong     | 32HK05   |
| GQ856810         | Spike glycoprotein | Hong Kong     | 33HK05   |
| GQ856809         | Spike glycoprotein | Hong Kong     | 34HK06   |
| GQ856808         | Spike glycoprotein | Hong Kong     | 35HK06   |
| GQ856807         | Spike glycoprotein | Hong Kong     | 36HK06   |
| GQ856806         | Spike glycoprotein | Hong Kong     | 37HK06   |
| GQ856805         | Spike glycoprotein | Hong Kong     | 38HK06   |
| GQ856804         | Spike glycoprotein | Hong Kong     | 39HK06   |
| GQ856803         | Spike glycoprotein | Hong Kong     | 40HK06   |
| GQ856802         | Spike glycoprotein | Hong Kong     | 41HK06   |
| GQ856801         | Spike glycoprotein | Hong Kong     | 42HK06   |
| GQ856800         | Spike glycoprotein | Hong Kong     | 43HK06   |
| GQ856799         | Spike glycoprotein | Hong Kong     | 44HK06   |
| GQ856798         | Spike glycoprotein | Hong Kong     | 45HK06   |
| DQ445912         | Complete genome    | Netherlands   | 52NL03   |
| DQ445911         | Complete genome    | Netherlands   | 53NL04   |
| DQ231166         | Spike glycoprotein | Sweden        | 54SE04   |
| DQ231165         | Spike glycoprotein | Sweden        | 55SE05   |
| DQ231164         | Spike glycoprotein | Sweden        | 56SE05   |
| DQ231163         | Spike glycoprotein | Sweden        | 57SE05   |
| DQ231162         | Spike glycoprotein | Sweden        | 58SE05   |
| DQ231161         | Spike glycoprotein | Sweden        | 59SE04   |
| DQ231160         | Spike glycoprotein | Sweden        | 60SE04   |
| DQ231159         | Spike glycoprotein | Sweden        | 61SE04   |
| DQ231158         | Spike glycoprotein | Sweden        | 62SE05   |
| AY902242         | Spike glycoprotein | Sweden        | 63SE04   |
| NC_005831        | Complete genome    | Netherlands   | 64NL03   |
| AY567487         | Complete genome    | Netherlands   | 65NL03   |
| KT359913         | Spike glycoprotein | Malaysia      | 66MY13   |
| KT359912         | Spike glycoprotein | Malaysia      | 67MY13   |
| KT359911         | Spike glycoprotein | Malaysia      | 68MY13   |
| KT359910         | Spike glycoprotein | Malaysia      | 69MY13   |
| KT359909         | Spike glycoprotein | Malaysia      | 70MY12   |
| KT359908         | Spike glycoprotein | Malaysia      | 71MY12   |
| KT359907         | Spike glycoprotein | Malaysia      | 72MY12   |
| KT359906         | Spike glycoprotein | Malaysia      | 73MY12   |
| KT359905         | Spike glycoprotein | Malaysia      | 74MY12   |
| KT359904         | Spike glycoprotein | Malaysia      | 75MY12   |
| KT359903         | Spike glycoprotein | Malaysia      | 76MY12   |
| KT359902         | Spike glycoprotein | Malaysia      | 77MY12   |
| KT359901         | Spike glycoprotein | Malaysia      | 78MY12   |

(continued)

SUPPLEMENTAL TABLE 1

Continued

| Accession number | Gene region        | Country       | Tip name |
|------------------|--------------------|---------------|----------|
| KT359900         | Spike glycoprotein | Malaysia      | 79MY12   |
| KT359899         | Spike glycoprotein | Malaysia      | 80MY12   |
| KT359898         | Spike glycoprotein | Malaysia      | 81MY12   |
| KT359897         | Spike glycoprotein | Malaysia      | 82MY12   |
| KT359896         | Spike glycoprotein | Malaysia      | 83MY12   |
| KT359895         | Spike glycoprotein | Malaysia      | 84MY12   |
| KT359894         | Spike glycoprotein | Malaysia      | 85MY12   |
| KT359893         | Spike glycoprotein | Malaysia      | 86MY12   |
| KT359892         | Spike glycoprotein | Malaysia      | 87MY12   |
| KT359891         | Spike glycoprotein | Malaysia      | 88MY12   |
| KT359890         | Spike glycoprotein | Malaysia      | 89MY12   |
| KT359889         | Spike glycoprotein | Malaysia      | 90MY12   |
| KT359888         | Spike glycoprotein | Malaysia      | 91MY12   |
| KT359887         | Spike glycoprotein | Malaysia      | 92MY12   |
| KT359886         | Spike glycoprotein | Malaysia      | 93MY12   |
| KT359885         | Spike glycoprotein | Malaysia      | 94MY12   |
| KT359884         | Spike glycoprotein | Malaysia      | 95MY12   |
| KT359883         | Spike glycoprotein | Malaysia      | 96MY12   |
| KT359882         | Spike glycoprotein | Malaysia      | 97MY12   |
| KT359881         | Spike glycoprotein | Malaysia      | 98MY12   |
| KT359880         | Spike glycoprotein | Malaysia      | 99MY12   |
| KT359879         | Spike glycoprotein | Malaysia      | 100MY12  |
| KT359878         | Spike glycoprotein | Malaysia      | 101MY12  |
| KT359877         | Spike glycoprotein | Malaysia      | 102MY12  |
| KT359876         | Spike glycoprotein | Malaysia      | 103MY12  |
| KT359875         | Spike glycoprotein | Malaysia      | 104MY12  |
| KT359874         | Spike glycoprotein | Malaysia      | 105MY12  |
| KT359873         | Spike glycoprotein | Malaysia      | 106MY12  |
| KT359872         | Spike glycoprotein | Malaysia      | 107MY12  |
| KM077093         | Spike glycoprotein | United States | 108US91  |
| KM077092         | Spike glycoprotein | United States | 109US93  |
| KM077091         | Spike glycoprotein | United States | 110US95  |
| KM077090         | Spike glycoprotein | United States | 111US97  |
| KM077089         | Spike glycoprotein | United States | 112US01  |
| KM077088         | Spike glycoprotein | United States | 113US83  |
| KM077087         | Spike glycoprotein | United States | 114US87  |
| KM077086         | Spike glycoprotein | United States | 115US92  |
| KM077085         | Spike glycoprotein | United States | 116US90  |
| KM077084         | Spike glycoprotein | United States | 117US89  |
| KM077083         | Spike glycoprotein | United States | 118US90  |
| KM077082         | Spike glycoprotein | United States | 119US89  |
| KM077081         | Spike glycoprotein | United States | 120US90  |
| KM077080         | Spike glycoprotein | United States | 121US90  |
| KM077079         | Spike glycoprotein | United States | 122US99  |
| KM077078         | Spike glycoprotein | United States | 123US01  |
| KM077077         | Spike glycoprotein | United States | 124US91  |
| KM077076         | Spike glycoprotein | United States | 125US96  |
| KM077075         | Spike glycoprotein | United States | 126US96  |
| KM077074         | Spike glycoprotein | United States | 127US93  |
| KM077073         | Spike glycoprotein | United States | 128US92  |
| KM077072         | Spike glycoprotein | United States | 129US91  |
| KF530114         | Complete genome    | United States | 130US89  |
| KF530113         | Complete genome    | United States | 131US90  |
| KF530112         | Complete genome    | United States | 132US01  |
| KF530111         | Complete genome    | United States | 133US90  |
| KF530110         | Complete genome    | United States | 134US83  |
| KF530109         | Complete genome    | United States | 135US90  |
| KF530108         | Complete genome    | United States | 136US89  |
| KF530107         | Complete genome    | United States | 137US91  |
| KF530106         | Complete genome    | United States | 138US87  |
| KF530105         | Complete genome    | United States | 139US01  |
| KF530104         | Complete genome    | United States | 140US90  |
| JQ900259         | Complete genome    | United States | 142US05  |
| JQ900257         | Complete genome    | United States | 144US09  |
| JQ900256         | Complete genome    | United States | 145US09  |
| JQ900255         | Complete genome    | United States | 146US09  |
| JQ765575         | Complete genome    | United States | 147US05  |
| JQ765574         | Complete genome    | United States | 148US05  |
| JQ765573         | Complete genome    | United States | 149US05  |
| JQ765572         | Complete genome    | United States | 150US05  |

(continued)

SUPPLEMENTAL TABLE 1

Continued

| Accession number | Gene region        | Country       | Tip name |
|------------------|--------------------|---------------|----------|
| JQ765571         | Complete genome    | United States | 151US05  |
| JQ765570         | Complete genome    | United States | 152US05  |
| JQ765569         | Complete genome    | United States | 153US05  |
| JQ765568         | Complete genome    | United States | 154US05  |
| JQ765567         | Complete genome    | United States | 155US09  |
| JQ765566         | Complete genome    | United States | 156US08  |
| JQ765565         | Complete genome    | United States | 157US09  |
| JQ765564         | Complete genome    | United States | 158US09  |
| JQ765563         | Complete genome    | United States | 159US09  |
| JQ771060         | Complete genome    | United States | 160US10  |
| JQ771059         | Complete genome    | United States | 161US10  |
| JQ771058         | Complete genome    | United States | 162US10  |
| JQ771057         | Complete genome    | United States | 163US10  |
| JQ771056         | Complete genome    | United States | 164US10  |
| JQ771055         | Complete genome    | United States | 165US10  |
| KJ796467         | Spike glycoprotein | Ghana         | 166GH12  |
| KJ796466         | Spike glycoprotein | Ghana         | 167GH12  |
| KJ796465         | Spike glycoprotein | Ghana         | 168GH12  |
| KJ768643         | Spike glycoprotein | Ghana         | 169GH12  |
| KJ768642         | Spike glycoprotein | Ghana         | 170GH12  |
| KJ768641         | Spike glycoprotein | Ghana         | 171GH12  |
| KJ768640         | Spike glycoprotein | Ghana         | 172GH12  |
| KJ768639         | Spike glycoprotein | Ghana         | 173GH12  |
| KJ768638         | Spike glycoprotein | Ghana         | 174GH12  |
| KJ768637         | Spike glycoprotein | Ghana         | 175GH12  |
| KJ768636         | Spike glycoprotein | Ghana         | 176GH12  |
| KJ768635         | Spike glycoprotein | Ghana         | 177GH12  |
| KJ768634         | Spike glycoprotein | Ghana         | 178GH12  |
| KJ768633         | Spike glycoprotein | Ghana         | 179GH12  |
| JX513255         | Spike glycoprotein | Thailand      | 180TH10  |
| JX513253         | Spike glycoprotein | Thailand      | 181TH10  |
| JX513249         | Spike glycoprotein | Thailand      | 182TH10  |
| JX524171         | Complete genome    | China         | 183CN09  |
| FJ656174         | Spike glycoprotein | Sweden        | 184SE07  |
| FJ656173         | Spike glycoprotein | Sweden        | 185SE07  |
| FJ656172         | Spike glycoprotein | Sweden        | 186SE07  |
| FJ656171         | Spike glycoprotein | Sweden        | 187SE07  |
| FJ656170         | Spike glycoprotein | Sweden        | 188SE07  |
| FJ656169         | Spike glycoprotein | Sweden        | 189SE07  |
| FJ656168         | Spike glycoprotein | Sweden        | 190SE06  |
| FJ656167         | Spike glycoprotein | Sweden        | 191SE07  |
| FJ656166         | Spike glycoprotein | Sweden        | 192SE07  |
| FJ656165         | Spike glycoprotein | Sweden        | 193SE07  |
| FJ656164         | Spike glycoprotein | Sweden        | 194SE07  |
| FJ656163         | Spike glycoprotein | Sweden        | 195SE07  |
| FJ656162         | Spike glycoprotein | Sweden        | 196SE07  |
| FJ656161         | Spike glycoprotein | Sweden        | 197SE07  |
| FJ656160         | Spike glycoprotein | Sweden        | 198SE07  |
| FJ656159         | Spike glycoprotein | Sweden        | 199SE07  |
| FJ656158         | Spike glycoprotein | Sweden        | 200SE07  |
| FJ656157         | Spike glycoprotein | Sweden        | 201SE07  |
| FJ656156         | Spike glycoprotein | Sweden        | 202SE06  |
| FJ656155         | Spike glycoprotein | Sweden        | 203SE06  |
| FJ656154         | Spike glycoprotein | Sweden        | 204SE06  |
| FJ656153         | Spike glycoprotein | Sweden        | 205SE06  |
